# Supplementary material
Source: PubMed Central journal article supplement (PMC4974884)
Supplement: CJN.10260915SupplementaryData.pdf [file CJN.10260915SupplementaryData.pdf]

## Appendix

Tables 3 and 4 list the probabilities of target attainment under a range of MIC values, where the target is defined as  $fT > 4 \times MIC \mu\text{g/mL}$  for 50% or 100% of the dosing interval, respectively.

Table 3: Probability of Target Attainment:  $fT > 4 \times MIC \mu\text{g/mL}$  for 50% of Dosing Interval

| MIC ( $\mu\text{g/mL}$ ) | Dose (g) | Freq. (h) | Prob. SI | Prob. EI | Prob. Ratio (95% CI) | P-value |
|--------------------------|----------|-----------|----------|----------|----------------------|---------|
| 4                        | 2        | 6         | 1.00     | 1.00     | 1.00 (1.00, 1.00)    | —       |
| 4                        | 2        | 8         | 1.00     | 1.00     | 1.00 (1.00, 1.00)    | —       |
| 4                        | 3        | 6         | 1.00     | 1.00     | 1.00 (1.00, 1.00)    | —       |
| 4                        | 3        | 8         | 1.00     | 1.00     | 1.00 (1.00, 1.00)    | —       |
| 4                        | 3        | 12        | 0.99     | 1.00     | 1.01 (1.00, 1.01)    | 0.001   |
| 4                        | 4        | 6         | 1.00     | 1.00     | 1.00 (1.00, 1.00)    | —       |
| 4                        | 4        | 8         | 1.00     | 1.00     | 1.00 (1.00, 1.00)    | —       |
| 4                        | 4        | 12        | 1.00     | 1.00     | 1.00 (1.00, 1.00)    | —       |
| 8                        | 2        | 6         | 0.99     | 0.99     | 1.01 (1.00, 1.01)    | <0.001  |
| 8                        | 2        | 8         | 0.95     | 0.97     | 1.03 (1.01, 1.04)    | 0.001   |
| 8                        | 3        | 6         | 1.00     | 1.00     | 1.00 (1.00, 1.00)    | —       |
| 8                        | 3        | 8         | 0.99     | 1.00     | 1.00 (1.00, 1.01)    | 0.11    |
| 8                        | 3        | 12        | 0.91     | 0.96     | 1.06 (1.03, 1.09)    | <0.001  |
| 8                        | 4        | 6         | 1.00     | 1.00     | 1.00 (1.00, 1.00)    | —       |
| 8                        | 4        | 8         | 1.00     | 1.00     | 1.00 (1.00, 1.00)    | —       |
| 8                        | 4        | 12        | 0.98     | 0.99     | 1.01 (1.00, 1.02)    | 0.005   |
| 16                       | 2        | 6         | 0.71     | 0.74     | 1.05 (1.01, 1.09)    | 0.007   |
| 16                       | 2        | 8         | 0.39     | 0.44     | 1.12 (1.09, 1.16)    | <0.001  |
| 16                       | 3        | 6         | 0.96     | 0.97     | 1.01 (1.00, 1.02)    | 0.005   |
| 16                       | 3        | 8         | 0.80     | 0.84     | 1.05 (1.01, 1.09)    | 0.006   |
| 16                       | 3        | 12        | 0.35     | 0.42     | 1.19 (1.13, 1.25)    | <0.001  |
| 16                       | 4        | 6         | 0.99     | 0.99     | 1.01 (1.00, 1.01)    | <0.001  |
| 16                       | 4        | 8         | 0.95     | 0.97     | 1.03 (1.01, 1.04)    | 0.001   |
| 16                       | 4        | 12        | 0.63     | 0.72     | 1.14 (1.12, 1.17)    | <0.001  |
| 32                       | 2        | 6         | 0.10     | 0.11     | 1.07 (1.01, 1.13)    | 0.03    |
| 32                       | 2        | 8         | 0.02     | 0.03     | 1.26 (1.03, 1.54)    | 0.02    |
| 32                       | 3        | 6         | 0.40     | 0.42     | 1.07 (1.04, 1.10)    | <0.001  |
| 32                       | 3        | 8         | 0.18     | 0.19     | 1.09 (1.04, 1.15)    | <0.001  |
| 32                       | 3        | 12        | 0.02     | 0.03     | 1.25 (0.94, 1.66)    | 0.12    |
| 32                       | 4        | 6         | 0.71     | 0.74     | 1.05 (1.01, 1.09)    | 0.007   |
| 32                       | 4        | 8         | 0.39     | 0.44     | 1.12 (1.09, 1.16)    | <0.001  |
| 32                       | 4        | 12        | 0.10     | 0.11     | 1.19 (1.08, 1.31)    | <0.001  |
| 64                       | 2        | 6         | 0.00     | 0.00     | — (—, —)             | —       |
| 64                       | 2        | 8         | 0.00     | 0.00     | — (—, —)             | —       |
| 64                       | 3        | 6         | 0.02     | 0.02     | 1.17 (1.00, 1.37)    | 0.06    |
| 64                       | 3        | 8         | 0.00     | 0.00     | — (—, —)             | —       |
| 64                       | 3        | 12        | 0.00     | 0.00     | — (—, —)             | —       |
| 64                       | 4        | 6         | 0.10     | 0.11     | 1.07 (1.01, 1.13)    | 0.03    |
| 64                       | 4        | 8         | 0.02     | 0.03     | 1.26 (1.03, 1.54)    | 0.02    |
| 64                       | 4        | 12        | 0.00     | 0.00     | — (—, —)             | —       |

'Prob.' denotes probability of target attainment. A dash symbol ("—") indicates that the corresponding probability ratio or P-value could not be estimated reliably, e.g., when the denominator probability was zero.

Table 4: Probability of Target Attainment:  $fT > 4 \times MIC_{\mu g/mL}$  for 100% of Dosing Interval

| MIC ( $\mu g/mL$ ) | Dose (g) | Freq. (h) | Prob. SI | Prob. EI | Prob. Ratio (95% CI) | P-value |
|--------------------|----------|-----------|----------|----------|----------------------|---------|
| 4                  | 2        | 6         | 0.99     | 1.00     | 1.01 (1.00, 1.02)    | 0.001   |
| 4                  | 2        | 8         | 0.92     | 0.98     | 1.06 (1.01, 1.11)    | 0.01    |
| 4                  | 3        | 6         | 1.00     | 1.00     | 1.00 (1.00, 1.01)    | <0.001  |
| 4                  | 3        | 8         | 0.98     | 1.00     | 1.02 (1.01, 1.03)    | 0.002   |
| 4                  | 3        | 12        | 0.77     | 0.88     | 1.15 (1.11, 1.20)    | <0.001  |
| 4                  | 4        | 6         | 1.00     | 1.00     | 1.00 (1.00, 1.00)    | —       |
| 4                  | 4        | 8         | 0.99     | 1.00     | 1.01 (1.00, 1.02)    | 0.001   |
| 4                  | 4        | 12        | 0.86     | 0.95     | 1.10 (1.06, 1.14)    | <0.001  |
| 8                  | 2        | 6         | 0.87     | 0.98     | 1.12 (1.06, 1.19)    | <0.001  |
| 8                  | 2        | 8         | 0.58     | 0.77     | 1.34 (1.22, 1.46)    | <0.001  |
| 8                  | 3        | 6         | 0.97     | 1.00     | 1.02 (1.01, 1.04)    | 0.006   |
| 8                  | 3        | 8         | 0.82     | 0.95     | 1.16 (1.10, 1.23)    | <0.001  |
| 8                  | 3        | 12        | 0.34     | 0.51     | 1.50 (1.32, 1.70)    | <0.001  |
| 8                  | 4        | 6         | 0.99     | 1.00     | 1.01 (1.00, 1.02)    | 0.001   |
| 8                  | 4        | 8         | 0.92     | 0.98     | 1.06 (1.01, 1.11)    | 0.012   |
| 8                  | 4        | 12        | 0.55     | 0.71     | 1.30 (1.19, 1.41)    | <0.001  |
| 16                 | 2        | 6         | 0.32     | 0.55     | 1.73 (1.51, 1.97)    | <0.001  |
| 16                 | 2        | 8         | 0.10     | 0.20     | 1.92 (1.62, 2.27)    | <0.001  |
| 16                 | 3        | 6         | 0.69     | 0.89     | 1.30 (1.21, 1.39)    | <0.001  |
| 16                 | 3        | 8         | 0.34     | 0.54     | 1.61 (1.44, 1.81)    | <0.001  |
| 16                 | 3        | 12        | 0.05     | 0.10     | 1.81 (1.60, 2.05)    | <0.001  |
| 16                 | 4        | 6         | 0.87     | 0.98     | 1.12 (1.06, 1.19)    | <0.001  |
| 16                 | 4        | 8         | 0.58     | 0.77     | 1.34 (1.22, 1.46)    | <0.001  |
| 16                 | 4        | 12        | 0.14     | 0.23     | 1.67 (1.48, 1.89)    | <0.001  |
| 32                 | 2        | 6         | 0.02     | 0.06     | 2.52 (1.37, 4.63)    | 0.003   |
| 32                 | 2        | 8         | 0.00     | 0.01     | — (—, —)             | —       |
| 32                 | 3        | 6         | 0.15     | 0.27     | 1.80 (1.60, 2.04)    | <0.001  |
| 32                 | 3        | 8         | 0.03     | 0.06     | 1.94 (1.45, 2.60)    | <0.001  |
| 32                 | 3        | 12        | 0.00     | 0.00     | — (—, —)             | —       |
| 32                 | 4        | 6         | 0.32     | 0.55     | 1.73 (1.51, 1.97)    | <0.001  |
| 32                 | 4        | 8         | 0.10     | 0.20     | 1.92 (1.62, 2.27)    | <0.001  |
| 32                 | 4        | 12        | 0.01     | 0.02     | 2.50 (1.55, 4.03)    | <0.001  |
| 64                 | 2        | 6         | 0.00     | 0.00     | — (—, —)             | —       |
| 64                 | 2        | 8         | 0.00     | 0.00     | — (—, —)             | —       |
| 64                 | 3        | 6         | 0.00     | 0.01     | — (—, —)             | —       |
| 64                 | 3        | 8         | 0.00     | 0.00     | — (—, —)             | —       |
| 64                 | 3        | 12        | 0.00     | 0.00     | — (—, —)             | —       |
| 64                 | 4        | 6         | 0.02     | 0.06     | 2.52 (1.37, 4.63)    | 0.003   |
| 64                 | 4        | 8         | 0.00     | 0.01     | — (—, —)             | —       |
| 64                 | 4        | 12        | 0.00     | 0.00     | — (—, —)             | —       |

'Prob.' denotes probability of target attainment. A dash symbol ("—") indicates that the corresponding probability ratio or P-value could not be estimated reliably, e.g., when the denominator probability was zero.
